1 ***finFindR*: Computer-assisted Recognition and Identification of Bottlenose Dolphin Photos in R**

2 Jaime W. Thompson\*<sup>1</sup>, Victoria H. Zero<sup>1</sup>, Lori H. Schwacke<sup>2</sup>, Todd R. Speakman<sup>2</sup>, Brian M. Quigley<sup>2</sup>,  
3 Jeanine S. M. Morey, and Trent L. McDonald<sup>1</sup>

4 <sup>1</sup>Western EcoSystems Technology, Inc., Laramie, Wyoming 82072;

5 <sup>2</sup>National Marine Mammal Foundation, Johns Island, South Carolina 29455

6 Corresponding author: Jaime Thompson, WEST, Inc. 1610 E Reynolds St, Laramie, WY 82072,  
7 [jwthompson@west-inc.com](mailto:jwthompson@west-inc.com)

8 **Running headline** (up to 45 characters): Computer-assisted dolphin photo-identification

9 **Abstract**

- 10 1. Photographic identification is an essential research and management tool for studying  
11 population size and dynamics of common bottlenose dolphins (*Tursiops truncatus*).  
12 Photographic identification involves recognizing individuals based on unique dorsal fin  
13 markings. Manual identification of dolphins, while successful, is labor-intensive and  
14 time-consuming. To shorten processing times, we developed a series of neural networks  
15 that finds fins, assesses their unique characteristics, and matches them to an existing  
16 catalog.
- 17 2. Our software, *finFindR*, shortens photo-ID processing times by autonomously finding and  
18 isolating (*i.e.*, “cropping”) dolphin fins in raw field photographs, tracing the trailing edge  
19 of fins in cropped images, and producing a sorted list of likely identities from a catalog of  
20 known individuals. The program then presents users with the top 50 most likely matching  
21 identities, allowing users to view side-by-side image pairs and make final identity  
22 determinations.
- 23 3. During testing on two sets of novel images, *finFindR* placed the correct individual in the  
24 first position of its ordered list in 88% (238/272 and 354/400) of test cases. *finFindR*

25 placed the correct identity among the top 10 ranked images in 94% of test cases, and  
26 among the top 50 ranked images in 97% of test cases. Hence, if a match does not exist in  
27 the first 50 images of *finFindR*'s ordered list, researchers can be almost certain (~97%)  
28 that a match does not exist in the entire catalog.

29 4. During a head-to-head blind test of the human-only and *finFindR*-assisted matching  
30 methods, two experienced photo-ID technicians both achieved 97% correct identification  
31 of identities when matched against a catalog containing over 2,000 known individuals.  
32 However, the manual-only technician examined 124 images on average before making a  
33 match, while the technician using *finFindR* examined only 10 images on average before  
34 finding a match.

35 5. We conclude that *finFindR* will facilitate equal or improved match accuracy while greatly  
36 reducing the number of examined photos. The faster matches, automated detection, and  
37 automated cropping afforded by *finFindR* will greatly reduce typical photo-ID processing  
38 times.

39 **Key-words (no more than 8):** Cetacean, machine learning, neural network, non-invasive sampling,  
40 photo-identification software, *Tursiops truncatus*.

## 41 **Introduction**

42 Identifying individuals from photographs is a common task in population biology, especially when  
43 research involves species that are not readily captured (IWC, 1990; Marshall & Pierce, 2012). Photo  
44 identification (photo-ID) studies can provide information on demographic rates, population size, and  
45 habitat use. In the terrestrial environment, Kelly (2001) and Sandfort (2015) applied photo identification  
46 to study cheetah and Alpine ibex . In the oceanic environment, researchers have applied photo-ID to

47 species like whale sharks (Speed et al., 2008), sea otters (Gilkinson, Pearson, Weltz, & Davis, 2007),  
48 manatees (Langtimm et al., 2004), right whales (Hiby et al., 2013), humpback whales (Friday, Smith,  
49 Stevick, & Allen, 2000), and bottlenose dolphins (McDonald et al., 2017). Photo-ID methods recognize  
50 individuals using unique and enduring features, such as barnacle calluses on the heads of right whales or  
51 the fluke shape of humpback whales. In studies of common bottlenose dolphins (*Tursiops truncatus*),  
52 researchers have long used the nicks, notches, and scars on dorsal fins to track the occurrence of  
53 individuals over time and to assess movements and population trends (Wells & Scott, 1990; Würsig &  
54 Jefferson, 1990; Zolman, 2002; Mazzoil, McCulloch, Defran, & Murdoch, 2004; Speakman, Lane,  
55 Schwacke, Fair, & Zolman, 2010).

56 Although it produces valuable results, many photo-ID methods are time-consuming and labor-intensive.  
57 When applied to bottlenose dolphins, researchers manually crop raw field photos before attempting to  
58 recognize the unique dorsal fin markings of individuals. It is common to compare images of unknown  
59 individuals to large catalogs containing thousands to tens of thousands of known individuals in order to  
60 identify a potential match. Identifying the fin in a single photo can take multiple hours, even if experts in  
61 photo-ID are familiar with the population of interest. Moreover, in some cases two separate examinations  
62 of a catalog are required to conclude a query image contains a previously unknown individual.

63 Software that facilitates partially automated photo-ID for bottlenose dolphins has existed for some time  
64 (Stewman, Stanley, & Allen, 1995; Auger-Méthé, Marcoux, & Whitehead, 2011; Towner, Wcisel,  
65 Reisinger, Edwards, & Jewell, 2013). Previous generations of dolphin photo-ID software generally relied  
66 on “landmarks” (anatomical reference points) to match individuals and often required substantial image  
67 processing by hand. Even after substantial processing, these systems achieve mixed accuracy and are  
68 heavily dependent on technician experience.

69 The rapid expansion of social media since the turn of the century has prompted improvements in photo  
70 recognition algorithms of all types. Current identification methods are typically landmark-free and

71 generally rely on neural networks trained using machine learning methods. Image processing systems can  
72 now achieve human-level recognition rates for faces and many anthropogenic objects (Lin et al., 2014;  
73 Taigman, Yang, Ranzato, & Wolf, 2014).

74 We adapted social media image processing and recognition methods for application to bottlenose dolphin  
75 photo-ID tasks. Here, we introduce *finFindR*, a software system containing several neural networks that  
76 substantially shortens photo-ID processing time by autonomously cropping fins from raw photos and  
77 producing a list of likely identities sorted by likelihood. *finFindR*'s workflow generally consists of  
78 finding and isolating dorsal fins in a query (raw) image, tracing the trailing edge of fins, assigning a  
79 “score” based on distinctive characteristics, and sorting similarly “scored” identities in a catalog of known  
80 individuals by the likelihood that they match the query image. We implemented the system as an open-  
81 source R package and an associated user-friendly HTML-based application that requires no programming  
82 experience.

83 In this paper, we describe methods behind the general steps of *finFindR*'s workflow. As part of this work,  
84 we compared the error rates of *finFindR* to both highly experienced and novice biological technicians  
85 using a traditional manual photo-ID matching approach.

## 86 ***finFindR* workflow**

87 *finFindR*'s workflow consists of three steps: 1) autonomous image processing to find and isolate dorsal  
88 fins in field photographs, 2) isolation of each fin's trailing edge and computation of a “score” based on  
89 distinguishing features, and 3) computation of the proximity of an image's “score” to the “scores” of all  
90 fins in a reference catalog. *finFindR*'s wiki (<https://github.com/haimeh/finFindR/wiki>) contains specific  
91 information about implementing each workflow step and should generally be considered the most up-to-  
92 date user reference for *finFindR*.

93 *Step 1: Fin isolation*

94 To autonomously identify fins in raw color (RGB) images (e.g., Figure 1a), we implemented a novel  
95 neural network architecture loosely based on the “resnet” architecture (He, Zhang, Ren, & Sun, 2015).  
96 We constructed the training dataset for this network by manually labeling ~10,000 dorsal fin photographs.  
97 Manual labeling entailed outlining the fin’s edge and dolphin body by hand and assigning integer values  
98 to each region (“1” = fin edge, “2” = body; Figure 1b). Training involved passing fin photos to the  
99 network as input, allowing the network to predict regions containing fin edges and bodies, comparing  
100 predictions to labeled regions, and using backward propagation to adjust network weights. Over many  
101 training iterations, the network “learned” the characteristics of images generally associated with labels, in  
102 this case fin edges and dolphin bodies. The network outputs a pixel-based continuous value between 0  
103 and 1 representing the likelihood that the pixel is part of a fin or body (Figure 1c). *finFindR* then creates a  
104 bounding polygon around pixels with likelihood values exceeding a sensitivity threshold. Users can  
105 specify both the sensitivity and whether extracted images should contain fins only or both fin and body.  
106 *finFindR* allows users to increase the default sensitivity threshold (0.4) to reduce the number of false fin  
107 detections. Users can also reduce the threshold to increase *finFindR*’s sensitivity for small or distant fins.  
108 Finally, *finFindR* places a rectangle around all bounding polygons in the photo and saves each to separate  
109 image files (Figure 1d).

110 *Step 2: Trailing edge isolation and characteristic measurement*

111 Following fin isolation, *finFindR* isolates the trailing edge of each fin, standardizes the fin’s size, and  
112 characterizes its distinguishing features. *finFindR* isolates the trailing edge of fins using three neural  
113 networks trained to distinguish the trailing from the leading edge and to distinguish fin from body.  
114 Once the trailing edge has been isolated, *finFindR* extracts characteristics of the trailing edge by recording  
115 red-blue-green (RGB) color values at 16 locations surrounding pixels in a large sample of pixels along the  
116 trailing edge. This sampling results in a three-dimensional matrix (hereafter, tensor) with dimensions  
117 equal to the number of pixels along trailing edge, by 16 locations, by 3 color channels. *finFindR*’s tracing

118 tool resizes the tensor's first dimension (*i.e.*, the fin's trailing edge) to a standard length by applying cubic  
119 spline interpolation (Hazewinkel, 2001). Resizing the tensor in this way accommodates variable length fin  
120 edges and makes training more efficient. This standardized tensor is input to a neural network designed to  
121 distinguish individuals in the next step.

### 122 *Step 3: Characteristic extraction and mapping*

123 The neural network in this step is *finFindR*'s key feature and primary contribution to photo recognition  
124 technologies. The neural network in this step computes and outputs a "score" based on the fin's  
125 distinguishing features. *finFindR* is designed to map scores to a high-dimensional mathematical space  
126 where individuals can be identified. That is, the network produces scores in a space where multiple  
127 pictures of the same fin are "close" to one another (in the high dimensional space) and "far" from the  
128 scores of other individuals. This mapping drastically reduces match-finding times when identities in the  
129 reference catalog are sorted by their proximity ("closeness") to a query image in the high-dimensional  
130 space.

131 The process of mapping a tensor to high-dimensional space in a way that maximizes the distance between  
132 individuals is generally known as large-margin metric embedding (Weinberger & Saul, 2009; Faghri,  
133 Fleet, Kiros, & Fidler, 2017). We made two important modifications to make our max-margin embedding  
134 network trainable on 10,000 or fewer images. First, we induced negative curvature in the distance metric  
135 of the embedding space. This step created greater representational capacity, which ultimately allowed  
136 mapping more individuals into regions that do not already contain identities. Second, we used a squared  
137 soft-plus loss function computed on image sets containing randomly selected individuals and randomly  
138 selected photos of the same individual. Heuristically, this loss function measured distance between the  
139 embedding of a query image, those from other images of the same individual, and those known to be of  
140 other individuals.

#### 141 *Step 4: Identifying individual dolphins*

142 To construct an ordered list of likely matches, *finFindR* computes the distance between a query image's  
143 location in the embedding space and the location of all other images in the same space. We designed the  
144 network of Step 3 to cluster images of similar-looking fins together in the induced space in such a way  
145 that clusters of dissimilar fins largely do not overlap. For each query image, *finFindR* presents the user  
146 with both a list of the 50 “closest” identities and a hierarchical cluster of distances between individual  
147 fins. Based on these outputs, users make the final determination of matches and assign unique IDs. All  
148 vectors of characteristics (embeddings) and assigned IDs are stored in simple R objects (*i.e.*, .RData files).  
149 Users can choose to export characteristic vectors and IDs to other databases or software from R.

#### 150 **Comparison and validation**

151 Speakman et al. (2010) and Melancon et al. (2011) outline a photo matching protocol commonly used by  
152 dolphin researchers. Under this protocol, researchers first manually crop raw field images to isolate fins,  
153 then visually compare query images with those of known individuals and judge whether or not the query  
154 image matches one or more in the catalog. To assist with these tasks researchers have developed  
155 customized databases to house their images, store manually assigned characteristics, and filter large sets  
156 of images. For many years, researchers have used the *Finbase* Microsoft Access database to store,  
157 organize, and filter catalog images (Adams, Speakman, Zolman, & Schwacke, 2006). *Finbase* allows  
158 users to sort a catalog of fin images based on user-assigned attributes but does not otherwise recommend  
159 matches.

160 In order to evaluate the proficiency of *finFindR*'s matching algorithm, we matched a set of fin images  
161 using both the manual-only and *finFindR*-assisted methods. We compared both match agreement and the  
162 average number of inspected images required to obtain a match. Our query images consisted of 672 fin  
163 images taken during two surveys in Barataria Bay, Louisiana during May ( $n = 272$  images) and  
164 September 2017 ( $n = 400$  images). Of those, we easily matched 468 images based on known associates,

165 freeze-brands, and the feature sorting capabilities in *Finbase*. Of the remaining 204 images, we identified  
166 and removed 55 duplicate photos of the same fin, leaving 149 images of unique individuals ( $n = 135$   
167 individuals from May survey;  $n = 14$  individuals from September survey). We did not use any of the 672  
168 photos during *finFindR* training.

169 One of us (TRS) with extensive photo-analysis experience followed the *finFindR* workflow and matched  
170 individuals among the top 50 likely matches. During this trial, *finFindR* “found a match” when it placed  
171 the correct identity of a previously seen individual among the top 50 positions of the sorted list. Another  
172 of us (BMQ) with extensive photo-analysis experience manually matched the same set of dorsal fin  
173 images using *Finbase* only. Finally, a third researcher (JSMM) with less photo-analysis experience  
174 independently repeated the manual matching process using assistance from *Finbase* only. We ensured no  
175 communication between analysts during matching. The experienced analysts checked and verified each  
176 other’s matches (TRS verified BMQ *Finbase* results, BMQ verified TRS *finFindR* results, TRS verified  
177 JSMM *Finbase* results), and conducted additional full-catalog manual searches if no match was found.

178 Of the 149 identities, *finFindR* failed to place 5 (3%) known individuals in the top 50 ranked identities.  
179 Assisted by *Finbase*, the other experienced analyst failed to find 6 (4%) known individuals in the catalog.  
180 The less experienced analyst failed to find 11 (7%) known individuals. While the manual and *finFindR*-  
181 assisted error rates obtained by the experienced researchers were functionally equivalent and very low,  
182 the effort required to find a match using *finFindR* was considerably less than for the manual-only method.  
183 On average, the first experienced technician examined 10 images before finding a match using *finFindR*,  
184 while the other experienced analyst examined 124 photos on average before identifying a match. In some  
185 cases, the second analyst examined well over 1000 images to find a match.

186 In addition, we were interested in *finFindR*’s performance on obvious matches and duplicate images.  
187 We re-tested the *finFindR* method on all images from the same surveys, not just the unique individuals  
188 (*i.e.*, all 672 images). *finFindR* achieved similar results during this trial as it did during the test of unique



189 individuals reported above. During these latter tests, *finFindR* placed the correct identity among the top  
190 50 ranked mages in 97% of test cases (Table 1). In addition, *finFindR* placed the correct identity in the  
191 top position during 88% of our test cases, and among the top 10 ranked images during 94% of our tests  
192 (Table 1).

## 193 **Discussion**

194 Past software systems for identifying marine mammals made use of dolphin fin or whale fluke edge  
195 characteristics (Auger-Méthé et al. 2011; Towner et al. 2013). These programs were specifically designed  
196 for certain species and are difficult to apply to others in part because they rely on landmark features (*e.g.*,  
197 the tip of the dorsal fin) to scale the notches' characteristics (Stewman et al., 1995). Weideman et al.  
198 (2017) used differential curvature measures in a variety of dolphin and whale fin recognition problems,  
199 but these approaches are sensitive to noise and require careful feature isolation (Stewman et al., 1995).  
200 Because dolphins can be photographed from a variety of poses and viewpoints, and hence produce  
201 slightly perturbed images of the same fin, algorithms that rely purely on angles extracted along the fluke  
202 or fin have difficulty tracing and scaling the fin. *finFindR* overcomes these limitations by extracting a  
203 series of sub-images along the trailing edge that capture features in the vicinity of the edge, including  
204 coloration of scars. Hence, *finFindR* does not depend on perfect, consistent traces of the dorsal fin to  
205 achieve its results. *finFindR* leverages information in the vicinity of the edge and is able to match a wider  
206 range of fin photos.

207 Based on the results of our tests, researchers can have approximately 97% confidence that matches will  
208 occur (in the top 50 images) if the query image is of a previously known individual. That is, when  
209 matches are not found using *finFindR* (not present in the top 50 ranked images), researchers can either  
210 choose to manually search the entire catalog for a match or call the image a previously unseen individual.  
211 If researchers do the latter, they can be ~97% confident that the query image does not actually occur in  
212 the catalog and that the associated image is of a new individual. If the analyses of a particular study allow  
213 lower (than 97%) accuracy, *finFindR* can be run in a fully-automated mode by associating the query

214 image with the identity in the top slot of the ordered list. When run in fully-automated mode, researchers  
215 can expect approximately 88% correct matches.

## 216 **Conclusions**

217 *finFindR* allows rapid and accurate comparison of dorsal fin characteristics in unprocessed photographs  
218 with those in a catalog of known individuals. *finFindR* assists researchers by sorting field photos,  
219 discarding unusable images, cropping dorsal fin images, and greatly reducing the time required to find  
220 matches. We conclude the use of *finFindR* will sustain the accuracy of experienced fin matching  
221 researchers while drastically reducing typical dolphin photo-ID processing times.

## 222 **Author's contributions**

223 TLM and JWT conceived of the idea and together designed various features of *finFindR*; JWT designed  
224 additional features implemented in the methodology; TRS, BMQ, JSMM, and LHS collected the photos  
225 used to train and validate *finFindR*; VHZ, JWT, and TLM led manuscript writing. All authors contributed  
226 critically to manuscript drafts and gave final approval for publication.

## 227 **Data accessibility**

228 *finFindR* is an open-source collaboration between the National Marine Mammal Foundation (NMMF) and  
229 Western EcoSystems Technology, Inc. (WEST). The *finFindR* package and documentation are hosted at  
230 <https://rdr.io/github/haimeh/finFindR/man/finFindR-package.html>.

## 231 **References**

- 232 Adams, J., Speakman, T., Zolman, E., & Schwacke, L. H. (2006). Automating image matching,  
233 cataloging, and analysis for photo-identification research. *Aquatic Mammals*, 32, 374–384.
- 234 Auger-Méthé, M., Marcoux, M., & Whitehead, H. (2011). Computer-assisted photo-identification of  
235 narwhals. *Arctic*, 64(3), 342–352. doi:10.14430/arctic4123

- 236 Faghri, F., Fleet, D. J., Kiros, J. R., & Fidler, S. (2017). VSE++: Improving Visual-Semantic Embeddings  
237 with Hard Negatives. Retrieved from <http://arxiv.org/abs/1707.05612>
- 238 Friday, N., Smith, T. D., Stevick, P. T., & Allen, J. (2000). Measurement of photographic quality and  
239 individual distinctiveness for the photographic identification of humpback whales, *Megaptera*  
240 *novaeangliae*. *Marine Mammal Science*, *16*(2), 355–374. doi:10.1111/j.1748-7692.2000.tb00930.x
- 241 Gilkinson, A. K., Pearson, H. C., Wertz, F. D., & Davis, R. W. (2007). Photo-Identification of Sea Otters  
242 Using Nose Scars. *Journal of Wildlife Management*, *71*(6), 2045–2051. doi:10.2193/2006-410
- 243 Hazewinkel, M. (2001). *Spline interpolation*. *Encyclopedia of mathematics*.
- 244 He, K., Zhang, X., Ren, S., & Sun, J. (2015). Deep residual learning for image recognition. *ArXiv*  
245 *Preprint*, 1512.03385. doi:10.1007/s11042-017-4440-4
- 246 Hiby, L., Paterson, W. D., Redman, P., Watkins, J., Twiss, S. D., & Pomeroy, P. (2013). Analysis of  
247 photo-id data allowing for missed matches and individuals identified from opposite sides. *Methods*  
248 *in Ecology and Evolution*, *4*(3), 252–259. doi:10.1111/2041-210x.12008
- 249 IWC. (1990). Individual recognition of cetaceans: use of photo-identification and other techniques to  
250 estimate population parameters. In P. S. Hammond, S. A. Mizroch, & G. P. Donovan (Eds.), *The*  
251 *proceedings of the symposium and workshop on individual recognition and the estimation of*  
252 *cetacean population parameters (No. 12)*. International Whaling Commission.
- 253 Kelly, M. J. (2001). Computer-aided photograph matching in studies using individual identification: an  
254 example from Serengeti cheetahs. *Journal of Mammalogy*, *82*(2), 440–449.
- 255 Langtimm, C. A., Beck, C. A., Edwards, H. H., Fick-Child, Kristen J. Ackerman, B. B., Barton, S. L., &  
256 Hartley, W. C. (2004). Survival Estimates for Florida Manatees From the Photo-Identification of  
257 Individuals. *Marine Mammal Science*, *20*(3), 438–463. doi:10.1111/j.1748-7692.2004.tb01171.x

- 258 Lin, T. Y., Maire, M., Belongie, S., Hays, J., Perona, P., Ramanan, D., ... Zitnick, C. L. (2014). Microsoft  
259 COCO: Common objects in context. *Lecture Notes in Computer Science (Including Subseries*  
260 *Lecture Notes in Artificial Intelligence and Lecture Notes in Bioinformatics)*, 8693 LNCS(PART 5),  
261 740–755. doi:10.1007/978-3-319-10602-1\_48
- 262 Marshall, A. D., & Pierce, S. J. (2012). The use and abuse of photographic identification in sharks and  
263 rays. *Journal of Fish Biology*, 80(2), 1361–1379.
- 264 Mazzoil, M., McCulloch, S. D., Defran, R. H., & Murdoch, E. (2004). The use of digital photography and  
265 analysis for dorsal fin photo-identification of bottlenose dolphins. *Aquatic Mammalogy*, 30, 209-  
266 219+.
- 267 McDonald, T. L., Hornsby, F., Speakman, T., Zolman, E. S., Mullin, K. D., Sinclair, C., ... Schwacke, L.  
268 H. (2017). Survival, density, and abundance of common bottlenose dolphins in Barataria Bay (USA)  
269 following the Deepwater Horizon oil spill. *Endangered Species Research*, 33, 193–209.  
270 doi:10.3354/esr00806
- 271 Melancon, R. A. S., Lane, S., Speakman, T., Hart, L. B., Sinclair, C., Adams, J., ... Schwacke, L. (2011).  
272 *Photo-identification Field and Laboratory Protocols Utilizing FinBase Version 2.*
- 273 Sandfort, R. (2015). Estimating Alpine ibex (*Capra ibex*) abundance from photographic sampling.  
274 *Mammal Review*, 45(3), 191–195. doi:10.1111/mam.12039
- 275 Speakman, T. R., Lane, S. M., Schwacke, L. H., Fair, P. A., & Zolman, E. S. (2010). Mark-recapture  
276 estimates of seasonal abundance and survivorship for bottlenose dolphins (*Tursiops*  
277 *truncatus*) near Charleston, South Carolina, USA. *Journal of Cetacean Research and*  
278 *Management*, 11(2), 153–162.
- 279 Speed, C. W., Meekan, M. G., Rowat, D., Pierce, S. J., Marshall, A. D., & Bradshaw, C. J. A. (2008).  
280 Scarring patterns and relative mortality rates of Indian Ocean whale sharks. *Journal of Fish Biology*,

- 281           72(6), 1488–1503.
- 282   Stewman, J., Stanley, R., & Allen, M. (1995). DARWIN: A System to Identify Dolphins from Fin  
283           Profiles in Digital Images. *Proceedings of the 8th Annual Florida Artificial Intelligence Research*  
284           *Symposium*.
- 285   Taigman, Y., Yang, M., Ranzato, M. A., & Wolf, L. (2014). Deepface: Closing the gap to human-level  
286           performance in face verification. *Proceedings of the IEEE Conference on Computer Vision and*  
287           *Pattern Recognition*, 1701–1708.
- 288   Towner, A. V, Weisel, M. A., Reisinger, R. R., Edwards, D., & Jewell, O. J. D. (2013). Gauging the  
289           Threat□: The First Population Estimate for White Sharks in South Africa Using Photo Identification  
290           and Automated Software. *PLoS ONE*, 8(6), e66035. doi:10.1371/journal.pone.0066035
- 291   Weideman, H. J., Jablons, Z. M., Holmberg, J., Flynn, K., Calambokidis, J., Tyson, R. B., ... Stewart, C.  
292           V. (2017). Integral Curvature Representation and Matching Algorithms for Identification of  
293           Dolphins and Whales.
- 294   Weinberger, K. Q., & Saul, L. K. (2009). Distance Metric Learning for Large Margin Nearest Neighbor  
295           Classification. *Journal of Machine Learning Research*, 10, 207–244.
- 296   Wells, R. S., & Scott, M. D. (1990). Estimating bottlenose dolphin population parameters from individual  
297           identification and capture-release techniques. *Report of the International Whaling Commission*,  
298           *Special Is*, 407–415.
- 299   Würsig, B., & Jefferson, T. A. (1990). Methods of photo-identification for small cetaceans. *Reports of the*  
300           *International Whaling Commission, Special Is*, 43–50.
- 301   Zolman, E. S. (2002). Residence patterns of bottlenose dolphins (*Tursiops truncatus*) in the Stono River  
302           estuary, Charleston County, South Carolina, U.S.A. *Marine Mammal Science*, 18(4), 879–892.

303 doi:10.1111/j.1748-7692.2002.tb01079.x

304

305

306 **Tables and figures**

307

**Table 1:** Accuracy of image ranks produced by *finFindR* for novel images in two sets of hold-out images. Image identities verified through full search of the image catalog by an experienced image analyst after the experiment. Here, *n* is number of images. The two sets of images reflect field image-collection bouts conducted in Barataria Bay, Louisiana.

|                                       | May 2017 ( <i>n</i> = 272) | September 2017 ( <i>n</i> = 400) |
|---------------------------------------|----------------------------|----------------------------------|
| Top-ranked image was correct match    | 87.50% (238/272)           | 88.50% (354/400)                 |
| Correct match in top 10 ranked images | 94.12% (256/272)           | 93.25% (373/400)                 |
| Correct match in top 50 ranked images | 96.69% (263/272)           | 97.25% (389/400)                 |

308

309

310

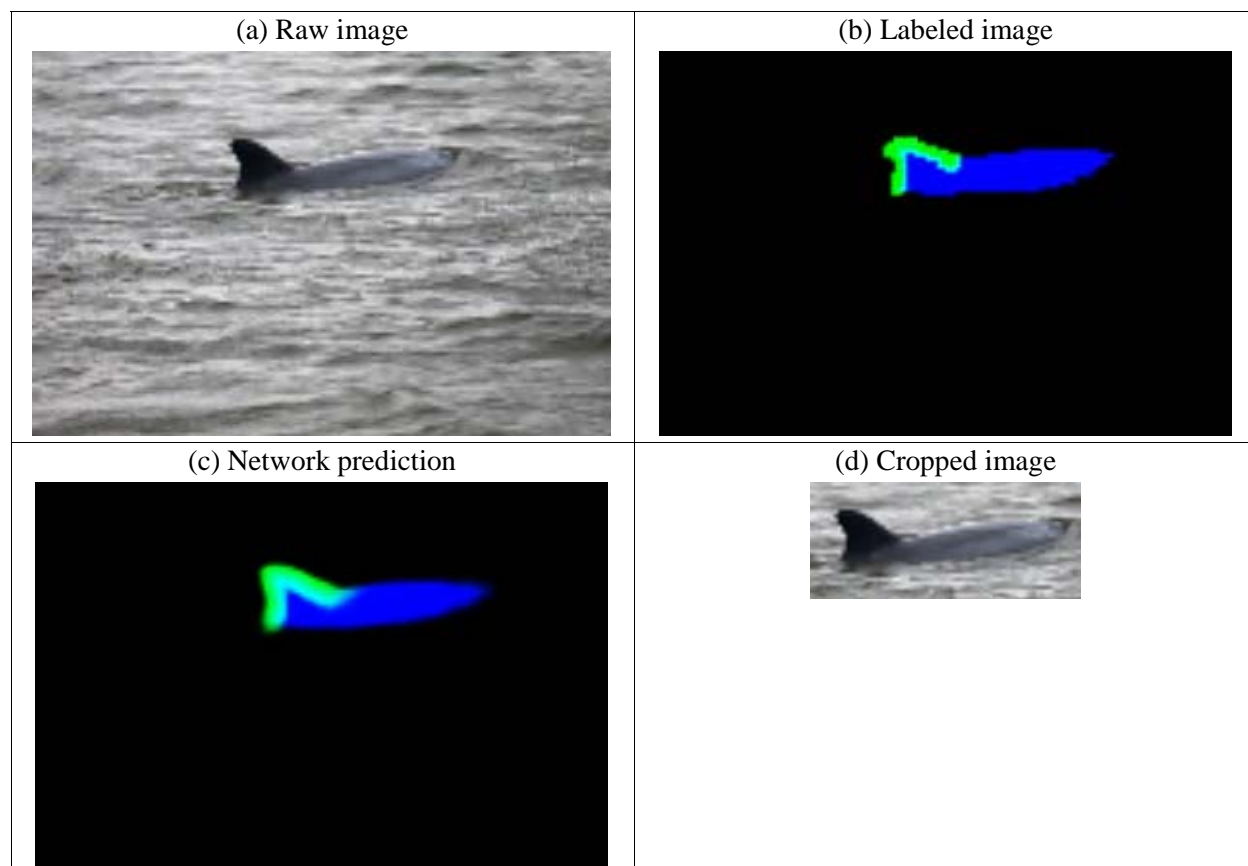

**Figure 1:** Example images illustrating fin and body isolation (Step 1 of the *finFindR* workflow). (a) The raw image; (b) manually labeled image showing location of fin edge (green) and body (blue); (c) the likelihood surface predicted by the trained network; and (d) the final cropped image.



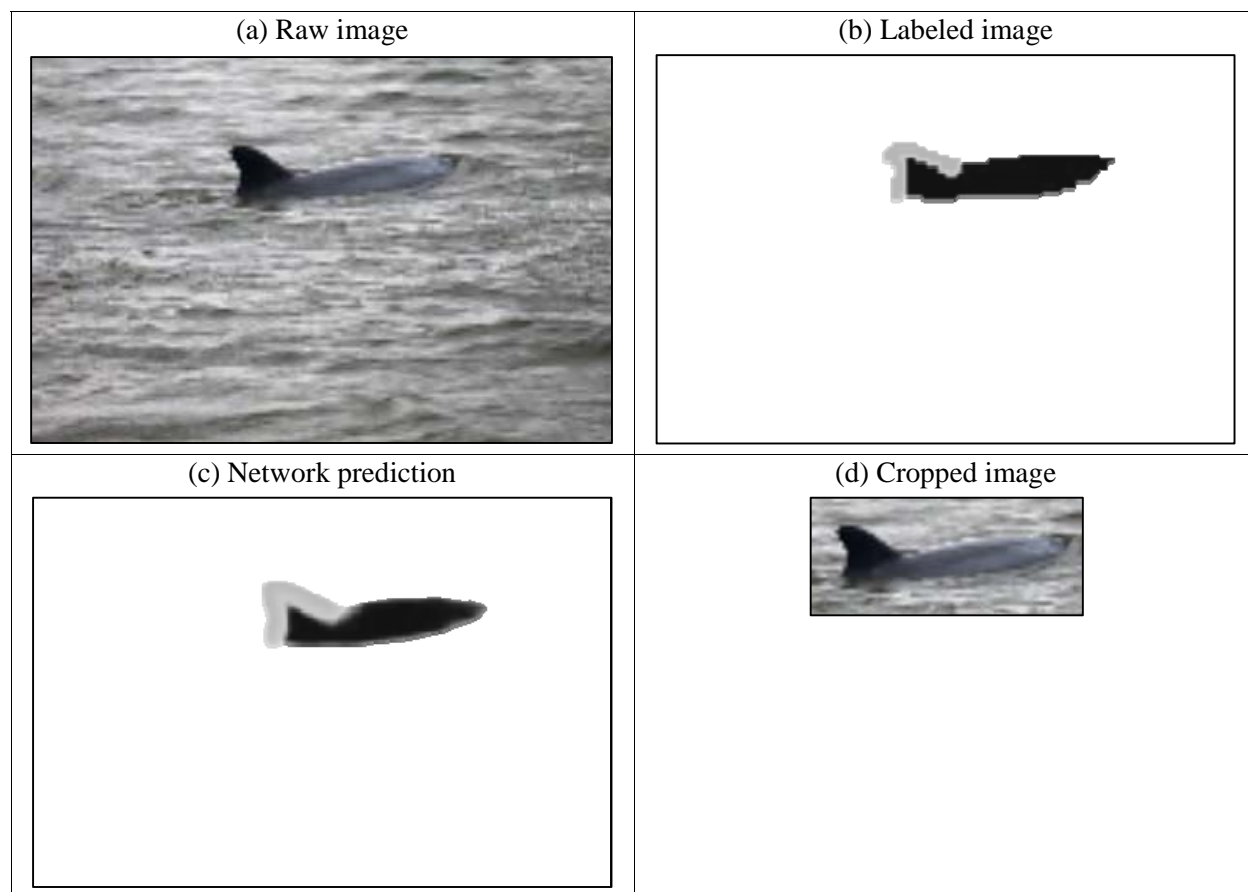

**Alternate Black and White Figure 1:** Example images illustrating fin and body isolation (Step 1 of the *finFindR* workflow). (a) The raw image; (b) manually labeled image showing location of fin edge (green) and body (blue); (c) the likelihood surface predicted by the trained network; and (d) the final cropped image.

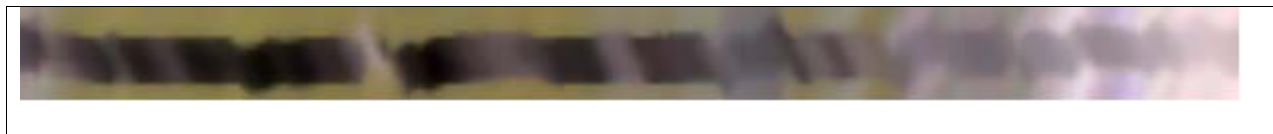

313 **Figure 2:** Example of a final preprocessed image input to the character extraction and mapping neural  
314 network of *finFindR*'s workflow (Step 3).
